# Supplementary material for: Implementing an Early Detection Program for Autism Spectrum Disorders in the Polish Primary Healthcare Setting—Possible Obstacles and Experiences from Online ASD Screening
Source: MDPI journal article supplement (doi:10.3390/brainsci14040388), 2024-04-16
Supplement: s1 [file s1]

**Table S1.** The usage of screening diagnostic methods for developmental disorders in the practice of Polish family doctors and pediatricians

| <b>Variable</b> (Total N = 95)                                                                                   | <b>n</b> | <b>%</b> |
|------------------------------------------------------------------------------------------------------------------|----------|----------|
| I do not use any screening methods                                                                               | 1        | 1.05%    |
| I ask about the child's achievement of typical milestones (e.g. sitting up, saying words)                        | 85       | 89.47%   |
| I obtain information about medical history in the family (e.g. ASD, ADHD, others)                                | 70       | 73.68%   |
| I try to establish contact with the child and observe his/her behavior in terms of communication and interaction | 89       | 93.68%   |
| I observe the child's behavior during the physical examination                                                   | 90       | 94.74%   |
| I use diagnostic tools that are completed by the parent/guardian                                                 | 20       | 21.05%   |
| I use diagnostic tools that require assessment by a health care professional                                     | 15       | 15.79%   |

**Note.** ASD – autism spectrum disorders, ADHD - attention deficit hyperactivity disorder
