# Supplementary material for: Implementing an Early Detection Program for Autism Spectrum Disorders in the Polish Primary Healthcare Setting—Possible Obstacles and Experiences from Online ASD Screening
Source: MDPI journal article supplement (doi:10.3390/brainsci14040388), 2024-04-16
Supplement: s1 [file s1]

**Table S2.** Potential obstacles to the implementation of screening in primary health care facilities according to surveyed physicians

| Potential obstacle                                                                                                                                                                            | Number of responses | % of doctors | Number of responses as most important obstacle | % of total as most important obstacle |
|-----------------------------------------------------------------------------------------------------------------------------------------------------------------------------------------------|---------------------|--------------|------------------------------------------------|---------------------------------------|
| insufficient time during the visit to perform additional examination                                                                                                                          | 87                  | 91.58%       | 47                                             | 49.47%                                |
| long queues to specialists                                                                                                                                                                    | 64                  | 67.37%       | 6                                              | 6.32%                                 |
| lack of recommendations regarding clinical practice in the field of screening for developmental disorders                                                                                     | 55                  | 57.89%       | 13                                             | 13.68%                                |
| lack of appropriate specialists in the area (psychologists, special educators, psychiatrists)                                                                                                 | 51                  | 53.68%       | 9                                              | 9.47%                                 |
| systemic difficulties (e.g. complicated further diagnostic path, lack of uniform rules regarding individual activities in given units, e.g. psychological and pedagogical counseling centers) | 46                  | 48.42%       | 9                                              | 9.47%                                 |
| lack of skills in using available screening diagnostic tools                                                                                                                                  | 34                  | 35.79%       | 3                                              | 3.16%                                 |
| lack of certainty regarding further action after a possible positive screening test result                                                                                                    | 33                  | 34.74%       | 1                                              | 1.05%                                 |
| lack of knowledge about developmental disorders                                                                                                                                               | 31                  | 32.63%       | 4                                              | 4.21%                                 |
| lack of clear, helpful additional materials                                                                                                                                                   | 30                  | 31.58%       | 2                                              | 2.11%                                 |
| lack of access to existing screening diagnostic tools                                                                                                                                         | 28                  | 29.47%       | 0                                              | 0.00%                                 |
| lack of confidence in the effectiveness of available screening diagnostic tools (e.g. too low sensitivity, too many false-positive cases)                                                     | 4                   | 4.21%        | 0                                              | 0.00%                                 |
| costs related to the preparation of additional questionnaires, informational materials etc.                                                                                                   | 2                   | 2.11%        | 1                                              | 1.05%                                 |
