# Supplementary material for: Implementing an Early Detection Program for Autism Spectrum Disorders in the Polish Primary Healthcare Setting—Possible Obstacles and Experiences from Online ASD Screening
Source: MDPI journal article supplement (doi:10.3390/brainsci14040388), 2024-04-16
Supplement: s1 [file s1]

### Metryczka:

**Wiek:**

**Płeć:** M/K

**Miejsce zamieszkania**

**Poziom wykształcenia**

**Subiektywna ocena umiejętności korzystania z technologii informatycznych (IT)**

### Udział w projekcie:

**1. Czy u Państwa dziecka w trakcie projektu Spojrzeć w oczy zdiagnozowano jakiekolwiek zaburzenie rozwojowe (tj. autyzm, zespół Aspergera, opóźnienie rozwoju mowy, ADHD)?**

Tak/Nie

#### Uwagi

**2. Czy korzystali Państwo z możliwości kontaktu z nami (w celu zadania dodatkowych pytań, uzyskania dalszej diagnostyki, informacji co do dalszego postępowania)?**

TAK/NIE

#### Uwagi

**3. Czy przed udziałem w projekcie słyszała Pan/Pani o zaburzeniach ze spektrum autyzmu?**

Tak/nie

**4. Czy przeszło Panu/Pani na myśl, że u Pani dzieci mogą występować ASD?**

Tak/nie

### Pytania dotyczące oceny screeningu ASD:

**1. Czy uważa Pani/Pan iż przesiewowe badanie w kierunku zaburzeń rozwojowych wśród dzieci powinno być obowiązkowe dla wszystkich dzieci podczas badań bilansowych (np. podczas bilansu 2-latka)?**

TAK/NIE

**2. Czy ponownie skorzystałaby Pani z możliwości dobrowolnego badania przesiewowego w kierunku zaburzeń rozwojowych u innych swoich dzieci – niezależnie od rodzaju badania (stacjonarnie/on-line)?**

TAK/NIE

**3. Czy ponownie skorzystałaby Pani z możliwości badania on-line w kierunku zaburzeń rozwojowych u innych swoich dzieci?**

TAK/NIE

**4. Jaka metoda badania przesiewowego w kierunku zaburzeń rozwojowych jest przez Panią/Pana preferowana?**

a) elektroniczna – online

b) stacjonarna – w przychodni podstawowej opieki zdrowotnej

**5. Czy informacje udzielane przez badaczy były dla Pani zrozumiałe i łatwo dostępne?**

1 – niejasne 5 – dobrze wyjaśnione i łatwo dostępne

**6. Czy towarzyszyło Pani/Panu uczucie, że mogą się Państwo zwrócić z każdym zapytaniem do badaczy dotyczącym rozwoju Państwa dziecka?**

1 – całkowicie się nie zgadzam 5 – całkowicie się zgadzam

**7. Czy uważają Państwo, że w razie trudności rozwojowych u Państwa dziecka, otrzymaliby Państwo odpowiednią pomoc/poradę od osób zaangażowanych w projekt?**

1 – całkowicie się nie zgadzam 5 – całkowicie się zgadzam

**8. Czy jest Pani ogólnie zadowolona z udziału w projekcie badawczym „Spojrzyć w oczy”?**

1- nie jestem w ogóle zadowolona 5 – jestem bardzo zadowolona

**9. Jakie trudności przeprowadzenia badania w wersji elektronicznej są dla Państwa największe? (niewymagana odpowiedź)**

- a) brak bezpośredniego (fizycznego) kontaktu z badającym (np. lekarzem, pielęgniarką, psychologiem)
- b) brak możliwości potwierdzenia wyniku badania przesiewowego w obserwacji klinicznej przez lekarza/psychologa
- c) konieczność oczekiwania na wyjaśnienie uzyskanego wyniku
- d) brak możliwości szybkiego wyjaśnienia wątpliwości dotyczących rozwoju zachowań dziecka
- e) brak zaufania do badanych

**10. Największe plusy z badania elektronicznego (niewymagana odpowiedź)**

- a) możliwość kontaktu z wykwalifikowanymi w zakresie zaburzeń rozwojowych pracownikami opieki zdrowotnej
- b) oszczędność czasu
- c) brak stygmatyzacji dziecka występowaniem zaburzeń rozwojowych (badacz nie zna osobiście rodziny/dziecka)
- d) możliwość wykonania badania w dowolnym, odpowiadającym momencie
- e) ułatwiony dostęp do badania (nie jest konieczne poszukiwanie osób wykwalifikowanych do przeprowadzenia screeningu)
